# Supplementary material for: Temperature-regulated heterogeneous extracellular matrix gene expression defines biofilm morphology in Clostridium perfringens
Source: PubMed Central journal article supplement (PMC7395162; doi:10.1038/s41522-020-00139-7), 2020-07-31
Supplement: 41522_2020_139_MOESM1_ESM.pdf [file 41522_2020_139_MOESM1_ESM.pdf]

## **Supplementary information**

### **Temperature-regulated heterogeneous extracellular matrix gene expression defines biofilm morphology in *Clostridium perfringens***

**Nozomu Obana, Kouji Nakamura, Nobuhiko Nomura**

**Supplementary Figure 1-12**

**Supplementary Table 1-3**

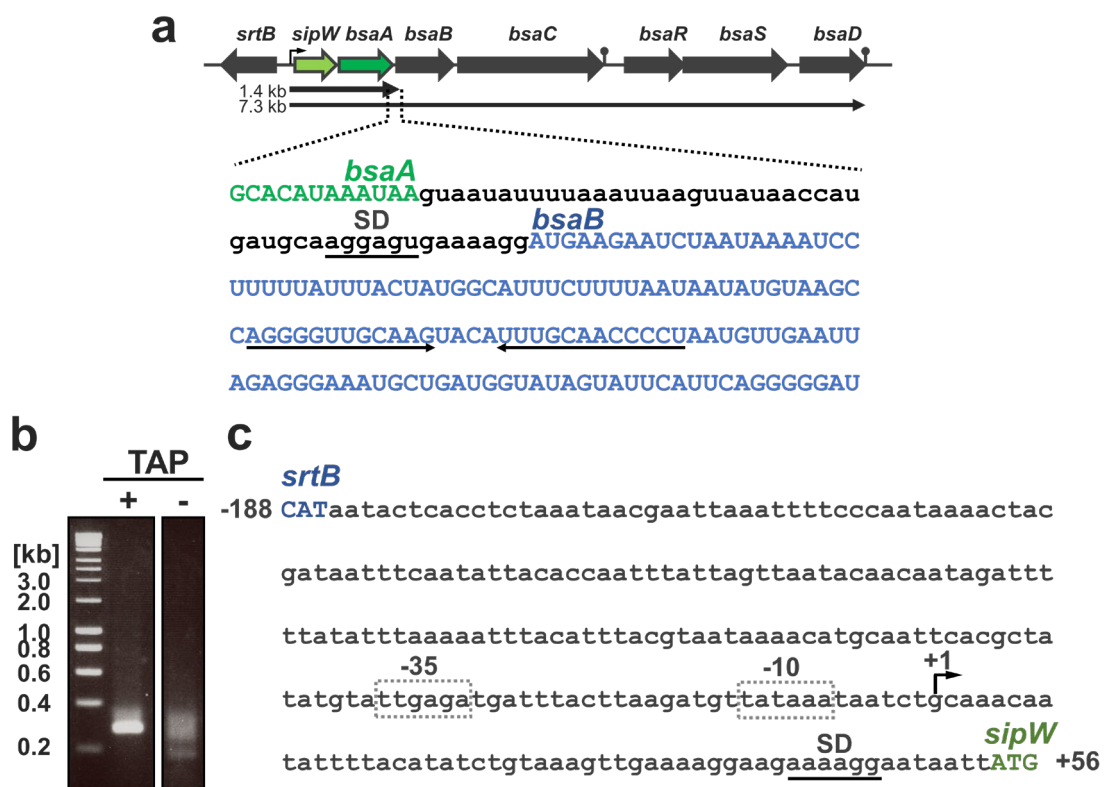

**Supplementary Figure 1. Identification of a transcriptional start site of *sipW* operon.**

(a) Schematics of the *sipW* operon and nucleotide sequence downstream of the *bsaA* gene. Inverted arrows show inverted repeat sequences. (b) Determination of the 5' end of *sipW* mRNA. Total RNA was left untreated or treated with TAP to distinguish primary transcripts from processed transcripts. PCR products amplified using primers for detection were resolved on a 2% agarose gel and stained with ethidium bromide. (c) Nucleotide sequence of the *sipW* promoter region. The "+1" label and bent arrow indicate the 5'-terminal site of the *sipW* transcripts detected by 5' RLM-RACE. Putative -10 and -35 sequence regions are boxed in dashed lines. The "+1" sign indicates the 5'-terminal sites of the *sipW* transcripts detected by 5' RLM-RACE.

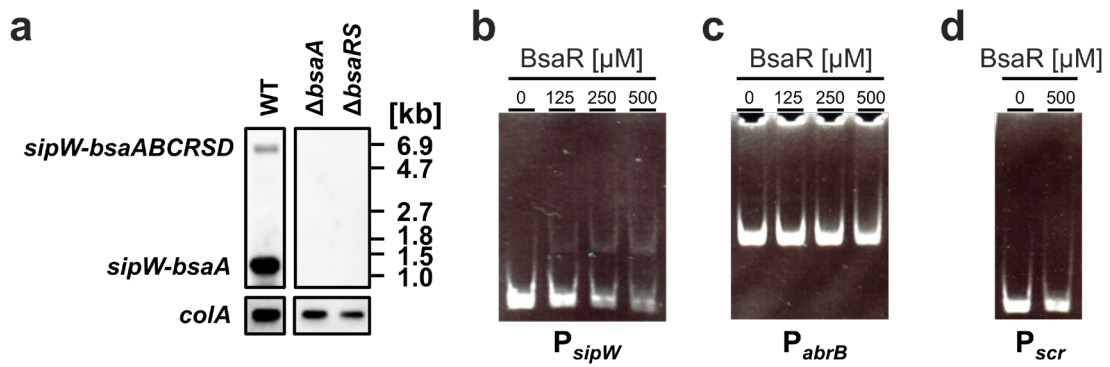

**Supplementary Figure 2. BsaRS two-component system regulates the *sipW* expression.** (a) Northern blotting of *sipW-bsaA*. Cells were grown at 37°C for 2 h. Total RNA (1  $\mu$ g) was separated on 1.2% denaturing agarose and probed with *sipW-bsaA*-specific DIG-labeled probes. As loading controls, the northern blotting of *colA*, the kappa-toxin (collagenase) gene, is shown. (b-d) Gel mobility shift assay with purified BsaR-His6 proteins. DNA fragments (50 ng) corresponding to the *sipW* promoter (b), *abrB* promoter (c) and *scr* promoter (d) were incubated with 0, 125, 250 or 500  $\mu$ M protein. Protein-DNA complexes were detected in the mixture of the BsaR proteins and the *sipW* promoter sequence.

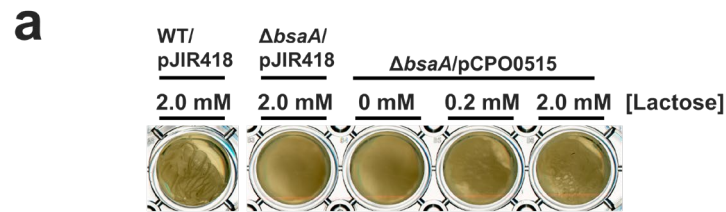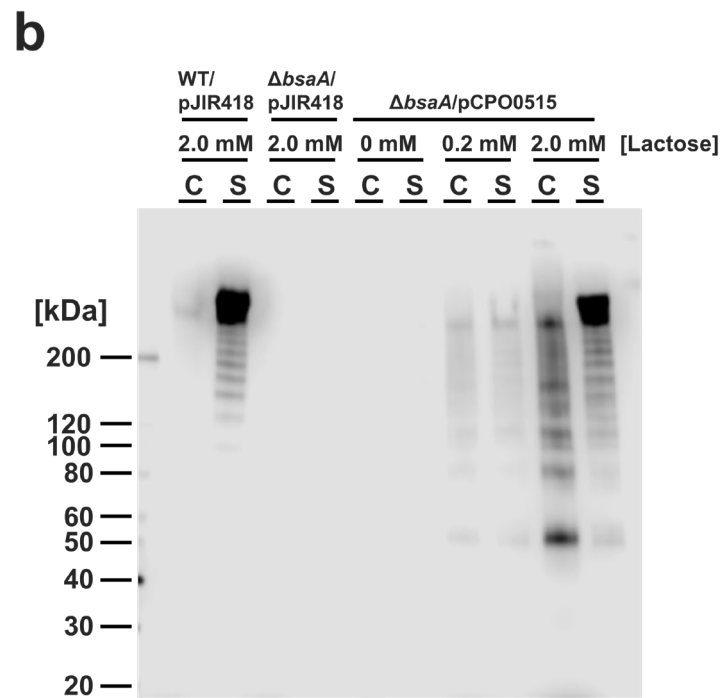

**Supplementary Figure 3. Complementation of *bsaA* restores pellicle biofilm**

**formation.** (a) Pellicle biofilm formation of strains harboring plasmids expressing the *bsaA* gene. Cells were grown at 25°C for 2 days with or without lactose. The photographs show the pellicle biofilm after picking by gentle pipette aspiration. The transcription of the *bsaA* gene in the complementation plasmid pCPO0515 is under the control of the lactose-inducible promoter *bgaL*. (b) Western blotting of BsaA proteins. Whole cell proteins (C) and supernatant proteins (S) were extracted from the cultures corresponding to Supplementary Figure 3a. The proteins were separated with 4-15% SDS-PAGE and probed with anti-BsaA antibodies. Each lane contained protein at O.D. 600 unit=0.002.



[fold dilution] 1:320    1:160    1:80    1:40    1:20    1:10

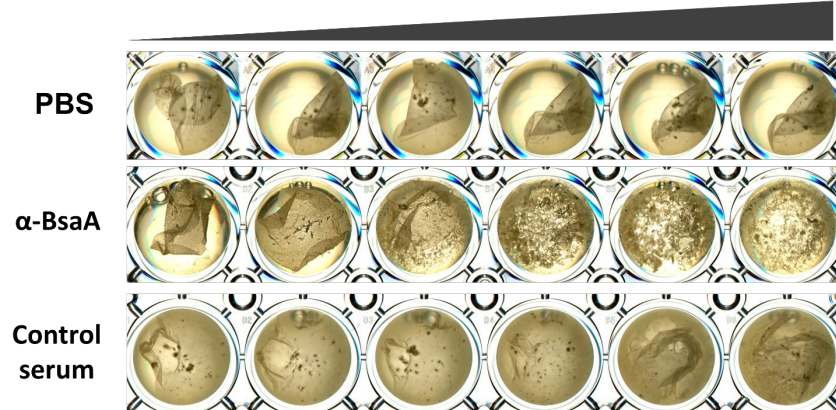

**Supplementary Figure 4. Anti-BsaA antibody inhibits pellicle biofilm formation.** An anti-BsaA antibody was added to the culture medium at a ratio indicated prior to incubation. PBS and rabbit serum of nonspecific to BsaA were used as negative controls. *C. perfringens* wild type (WT) cells were anaerobically grown at 25°C for 2 days. The photographs show the pellicle biofilm after picking by gentle pipette aspiration.

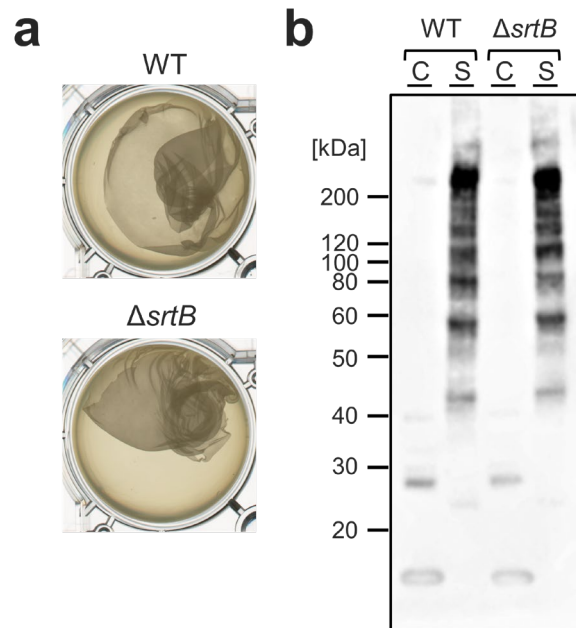

**Supplementary Figure 5. *srtB* is not necessary for pellicle biofilm formation and BsaA protein expression.** (a) Pellicle biofilm formation of WT and  $\Delta srtB$ . The photographs show the pellicle biofilm after picking by gentle pipette aspiration. (b) Western blotting of BsaA proteins. Whole cell proteins (C) and supernatant proteins (S) were extracted from the cultures of WT and  $\Delta srtB$ . The proteins were separated with 4-15% SDS-PAGE and probed with anti-BsaA antibodies. Each lane contains proteins at O.D. 600 unit=0.002.

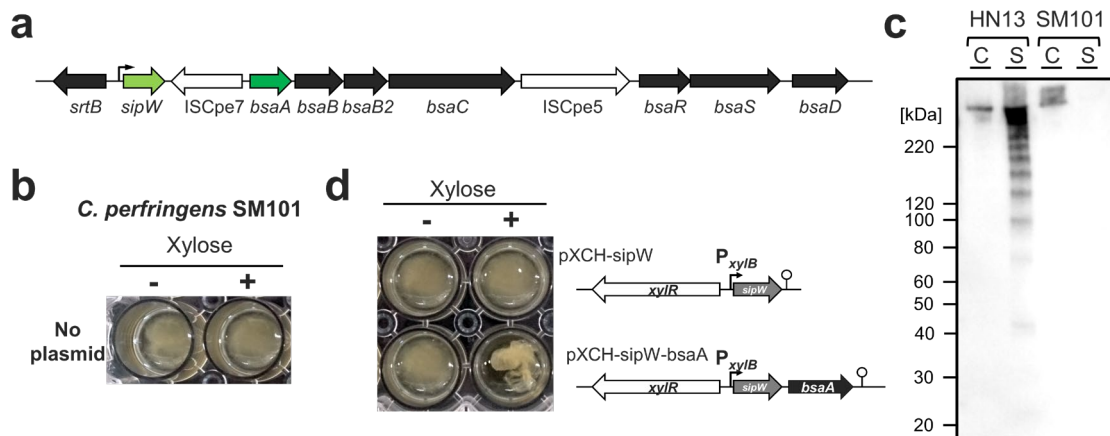

**Supplementary Figure 6. Overexpression of *sipW-bsaA* from HN13 allows pellicle biofilm formation in SM101.** (a) A schematic image of the *sipW* operon in *C. perfringens* type F strain SM101. An insertion sequence was naturally integrated into the *sipW* operon of the SM101 genome. (b) Pellicle biofilm formation of SM101. SM101 was deficient in pellicle biofilm formation. Cells were anaerobically grown at 25°C for 2 days. (c) Western blotting of BsaA proteins in HN13 and SM101. Cell extracts (C) and culture supernatants (S) were isolated from HN13 and SM101 cells grown at 25°C for 8 h to reach the mid-exponential phase. Protein samples (OD600 unit=0.004/lane) were separated on a 4-12% gradient SDS-polyacrylamide gel. BsaA proteins were detected with anti-BsaA antisera. (d) Pellicle biofilm formation of SM101 harboring the *sipW-bsaA* expression plasmid. Schematics show the plasmid construction for *sipW* or *sipW-bsaA* overproduction. The *sipW* or *sipW-bsaA* derived from *C. perfringens* type A strain HN13 in the plasmids were under the control of the xylose-inducible promoter *xyiB*. Xylose (0.01%) was added to the medium prior to incubation for the induction of the gene expression. The *sipW-bsaA* expression restored pellicle biofilm formation in SM101. Cells were anaerobically grown at 25°C for 2 days. The photographs show the pellicle biofilm after picking by gentle pipette aspiration.

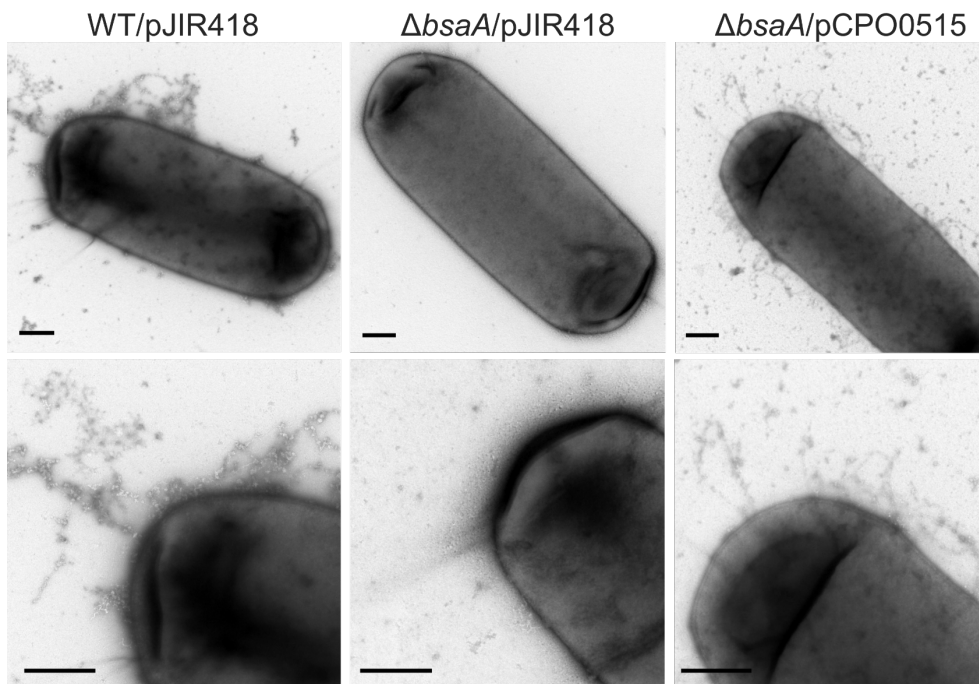

**Supplementary Figure 7. Transmission electron microscopic images of filamentous EPS.** Cells were anaerobically grown in GAM broth containing 2 mM lactose at 25°C for 2 days. Filamentous structures were observed in the periphery of WT cells or  $\Delta bsaA$  cells complemented with the *bsaA*-expressing plasmid. Bar=400 nm.

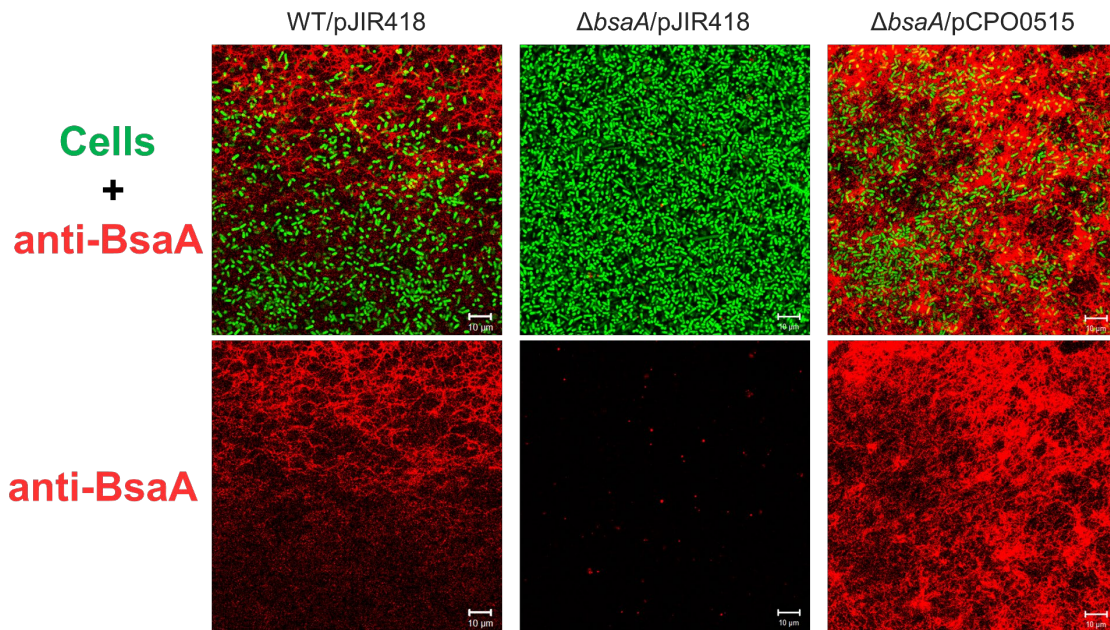

**Supplementary Figure 8. Complementation of BsaA restores filamentous EPS**

**production.** Cells were anaerobically grown in GAM broth containing 2 mM lactose at 25°C for 2 days. The biofilms were fixed with 4% formaldehyde and then probed with anti-BsaA antibodies (red). Cells were stained with Syto9 (green). Filamentous anti-BsaA signals were detected in WT cells harboring pJIR418 (empty vector) and Δ*bsaA* cells harboring pCPO0515 (*bsaA* expression vector). We observed much amount of BsaA filamentous structure in Δ*bsaA* cells harboring pCPO0515 than WT harboring empty vector. The expression of *bsaA* in pCPO0515, which is under the control of the lactose-inducible *bgaL* promoter, would be higher than the native promoter of *bsaA* (*sipW* promoter). Scale bars are 10 μm.



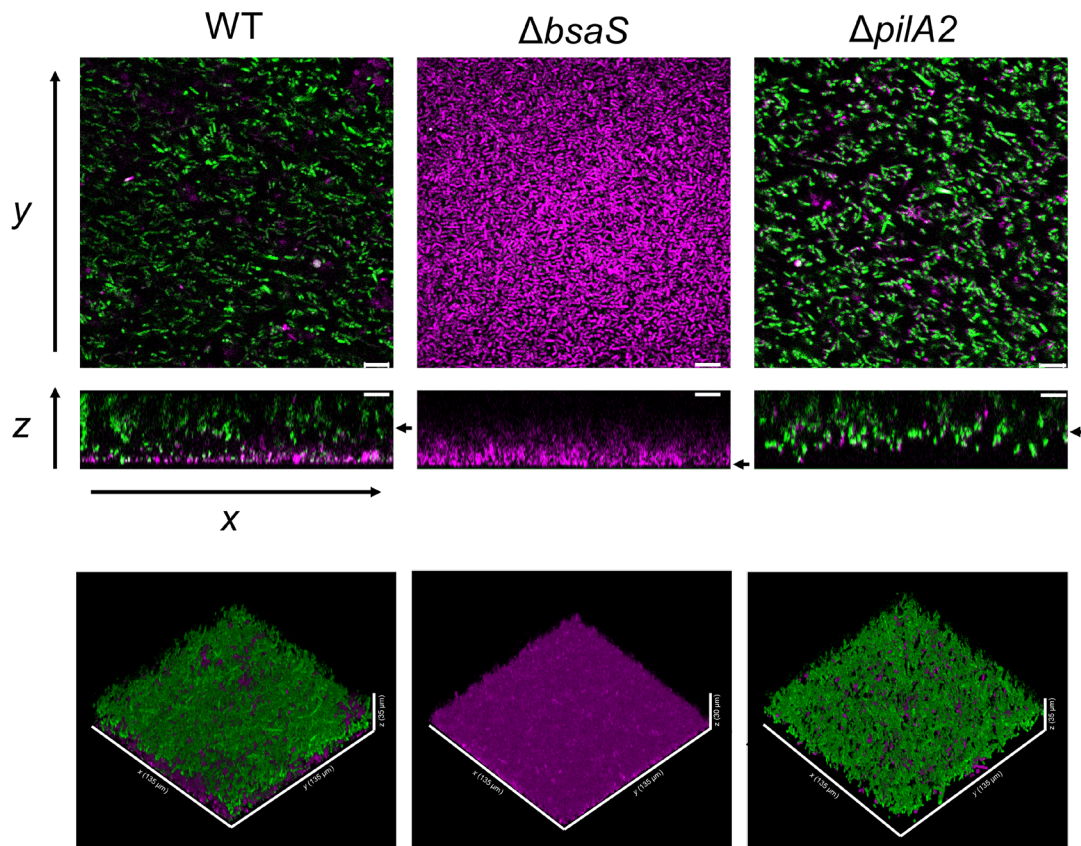

**Supplementary Figure 9.  $\Delta bsaS$  cells produce adhered biofilm at 25°C.** *C. perfringens* cells harboring pCPE2005 ( $P_{sipW}$ -*evoglow*-*Pp1*) were anaerobically grown in GAM broth at 25°C for 24 h. Cells were stained with FM4-64 (magenta). We observed the biofilms using CLSM. Representative images of the x-y section and x-z section (top), and 3D image (bottom) of each biofilm are shown. We detected  $P_{sipW}$ -ON cells (green) in WT, and  $\Delta pilA2$ , but not in  $\Delta bsaS$ . WT and  $\Delta pilA2$  form pellicle biofilms, whereas  $\Delta bsaS$  forms adhered biofilms. Bar=10  $\mu$ m.

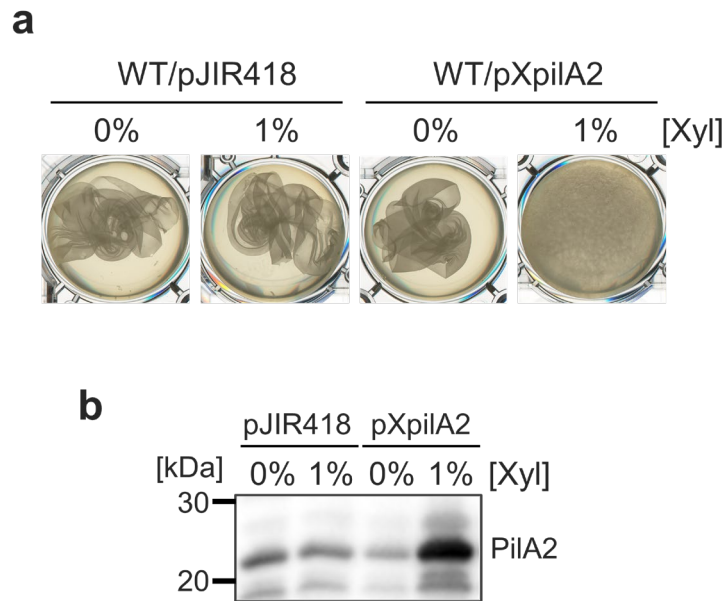

**Supplementary Figure 10. Overproduction of PilA2 inhibits pellicle biofilm formation.**

(a) Pellicle biofilm formation of strains harboring plasmids expressing the *pilA2* gene. Cells were grown at 25°C for 2 days with or without xylose. The photographs show the pellicle biofilm after picking by gentle pipette aspiration. The transcription of the *pilA2* gene in pXpilA2 was under the control of the xylose-inducible promoter *xyiB*. (b) Western blotting of PilA2 proteins. Whole cell proteins were extracted from the cultures described in Supplementary Figure 10a. The proteins were separated with 4-15% SDS-PAGE and probed with anti-PilA2 antibodies. PilA2 induced by 1% xylose inhibited pellicle biofilm formation.

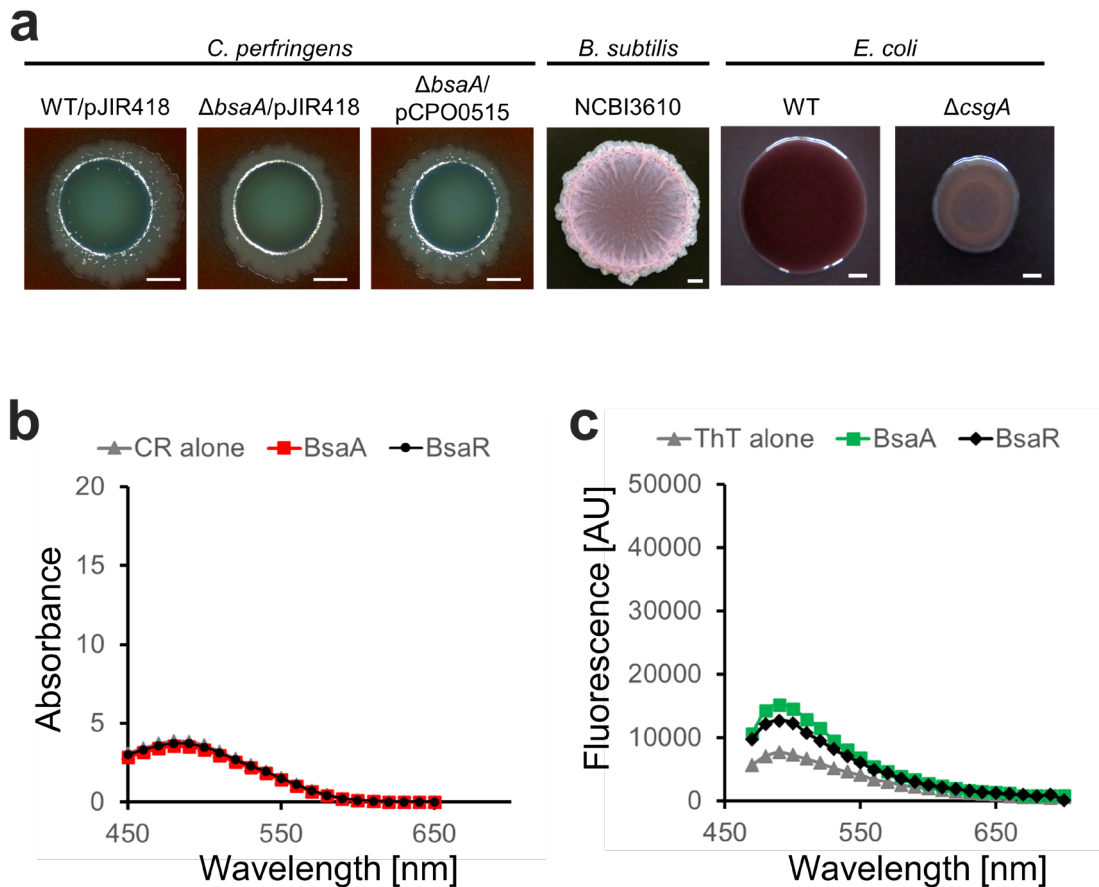

**Supplementary Figure 11. BsaA proteins do not bind to Congo Red and thioflavin T.**

(a) Colony morphology on agar plates containing 40  $\mu$ g/ml of Congo Red and 20  $\mu$ g/ml of Coomassie Brilliant Blue G (CBB). *C. perfringens* were cultured in PGY medium. After overnight culture, we spotted 5  $\mu$ l of the culture on GAM plates containing 1 mM lactose, Congo Red and CBB. *B. subtilis* and *E. coli* were grown in LB medium overnight. We spotted 5  $\mu$ l of the culture on LBGM (1% tryptone, 0.5% yeast extract, 1% glycerol, 10 mM MnSO<sub>4</sub>) or salt-free LB plates containing Congo Red and CBB. These plates were incubated at 25°C for 7 days (*C. perfringens*) or 4 days (*B. subtilis* and *E. coli*). Bar=0.5 mm. (b and c) Absorbance and fluorescence of BsaA proteins in the presence of Congo Red and Thioflavin T. Purified BsaA proteins (10  $\mu$ g) were suspended in 100 mM NaCl and 20 mM Tris-HCl (pH 7.5) and mixed with 20  $\mu$ M Congo Red (b) or Thioflavin T (c). The absorbance and the fluorescence (438-nm emission) of the suspension (100  $\mu$ l) were measured using a microplate reader (Synergy H1, BioTek, Winooski, VT). Congo Red or Thioflavin T alone serve as negative controls.



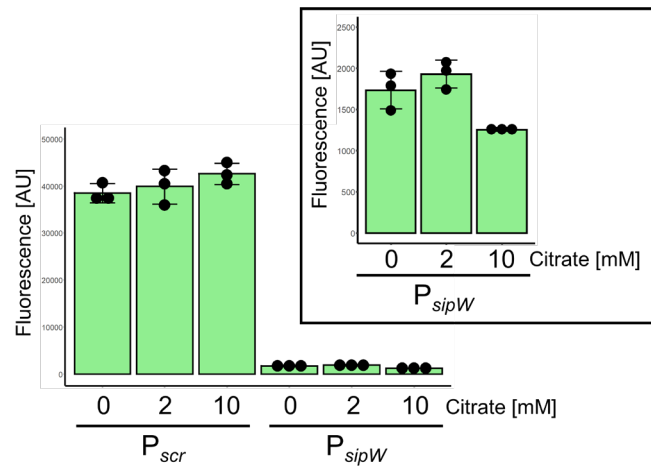

**Supplementary Figure 12. Citrate does not influence P<sub>sipW</sub> expression.** *C. perfringens* HN13 harboring pCPE2002 (P<sub>scr</sub>-*evoglow-Pp1*) or pCPE2005 (P<sub>sipW</sub>-*evoglow-Pp1*) were anaerobically grown in 1 ml of GAM containing citrate for 7 h at 37°C. The cells were washed with PBS and resuspended in 1 ml PBS. We measured the fluorescence (Ex/Em=450/495) of the suspension (100 μl) using a microplate reader. The means normalized by O.D.600 and standard deviations are represented.

Supplementary Table 1. Transposon mutants deficient in pellicle biofilm formation\*

| Locus (gene)            | Number of mutants | Function                                        |
|-------------------------|-------------------|-------------------------------------------------|
| CPE0515 ( <i>bsaA</i> ) | 2                 | Hypothetical protein                            |
| CPE0929                 | 1                 | Glycerol dehydrogenase large subunit            |
| CPE1512 ( <i>reeS</i> ) | 1                 | Sensor histidine kinase ReeS                    |
| CPE1941 ( <i>secF</i> ) | 1                 | Preprotein translocase subunit SecF             |
| CPE1942 ( <i>secD</i> ) | 1                 | Preprotein translocase subunit SecD             |
| CPE2033 ( <i>dnaK</i> ) | 1                 | Molecular chaperone DnaK                        |
| CPE2230                 | 1                 | Serine protease Do                              |
| CPE2274                 | 1                 | Nitrate extrusion protein NarK                  |
| CPE2418 ( <i>nusG</i> ) | 1                 | Transcription antitermination protein NusG      |
| CPE2507                 | 2                 | Anaerobic ribonucleoside triphosphate reductase |
| rRNA/tRNA               | 23                | Ribosomal RNA/transfer RNA                      |

\*Amongst 51 mutants, 9 mutants were not tested, and 7 mutants could not read. Thirty-five mutants successfully sequenced are listed.

Supplementary Table 2. Strains and plasmids used in this study

| Strain                          | Genotype or relevant characteristics                                                                                     | Source or reference          |
|---------------------------------|--------------------------------------------------------------------------------------------------------------------------|------------------------------|
| <b><i>C. perfringens</i></b>    |                                                                                                                          |                              |
| 13                              | Wild type                                                                                                                | Shimizu <i>et al.</i> (2002) |
| HN13                            | <i>galK</i> , <i>galT</i> in-frame deletion mutant of HN13                                                               | Nariya <i>et al.</i> (2011)  |
| NO25                            | <i>pilA2</i> in-frame deletion mutant of HN13                                                                            | Obana <i>et al.</i> (2014)   |
| NO41                            | <i>sipW</i> , <i>bsaA</i> in-frame deletion mutant of HN13                                                               | In this study                |
| NO42                            | <i>bsaA</i> in-frame deletion mutant of HN13                                                                             | In this study                |
| NO43                            | <i>bsaR</i> in-frame deletion mutant of HN13                                                                             | In this study                |
| NO44                            | <i>bsaS</i> in-frame deletion mutant of HN13                                                                             | In this study                |
| NO45                            | <i>bsaR</i> , <i>bsaS</i> in-frame deletion mutant of HN13                                                               | In this study                |
| NO46                            | <i>bsaB</i> in-frame deletion mutant of HN13                                                                             | In this study                |
| NO47                            | <i>bsaC</i> in-frame deletion mutant of HN13                                                                             | In this study                |
| NO48                            | <i>srtB</i> in-frame deletion mutant of HN13                                                                             | In this study                |
| NO77                            | <i>bsaD</i> in-frame deletion mutant of HN13                                                                             | In this study                |
| <b><i>E. coli</i></b>           |                                                                                                                          |                              |
| DH5 $\alpha$                    | Used for cloning                                                                                                         | TAKARA                       |
| M15/pREP4                       | Used for protein expression                                                                                              | Qiagen                       |
| <b>Plasmid</b>                  |                                                                                                                          |                              |
| pJIR418                         | <i>E. coli-C. perfringens</i> shuttle vector, Cm <sup>R</sup> , Em <sup>R</sup>                                          | Sloan J <i>et al.</i> (1992) |
| pCPO0514FLAG                    | FLAG-tagged <i>sipW</i> expression under control of lactose inducible promoter ( <i>bgaL</i> )                           | In this study                |
| pCPO0515                        | <i>bsaA</i> expression under control of lactose inducible promoter ( <i>bgaL</i> )                                       | In this study                |
| pCPE2001                        | <i>colA</i> -processed 5'UTR- <i>evoglow</i> - <i>Pp1</i> - <i>Cp</i> - <i>flag</i> in pJIR418                           | In this study                |
| pCPE2002                        | <i>P<sub>scr</sub></i> - <i>colA</i> -processed 5'UTR- <i>evoglow</i> - <i>Pp1</i> - <i>Cp</i> - <i>flag</i> in pJIR418  | In this study                |
| pCPE2005                        | <i>P<sub>sipW</sub></i> - <i>colA</i> -processed 5'UTR- <i>evoglow</i> - <i>Pp1</i> - <i>Cp</i> - <i>flag</i> in pJIR418 | In this study                |
| pXCH                            | Xylose-inducible promoter-harboring plasmid                                                                              |                              |
| pXCH- <i>sipW</i>               | <i>sipW</i> -carrying pXCH                                                                                               | In this study                |
| pXCH- <i>sipW</i> - <i>bsaA</i> | <i>sipW</i> - <i>bsaA</i> -carrying pXCH                                                                                 | In this study                |
| pXCH- <i>pilA2</i>              | <i>pilA2</i> -carrying pXCH                                                                                              | In this study                |
| pQE60                           | IPTG-inducible C-terminal His6 added protein expression vector                                                           | Qiagen                       |
| pQE60- <i>BsaR</i>              | <i>BsaR</i> -His6 expression vector                                                                                      | In this study                |
| pQE60- <i>BsaA</i>              | <i>BsaA</i> -His6 expression vector                                                                                      | In this study                |

Supplementary Table 3. Oligonucleotides used in this study

| Primer ID | Sequence                                                         | Use                                                                   |
|-----------|------------------------------------------------------------------|-----------------------------------------------------------------------|
| NOB-0777  | ggccgtcgacctatgccatctcttttaaataagtg                              | <i>sipW</i> mutant construction                                       |
| NOB-0879  | AAAGTGATTCTGGAGGAATAAGAAAGAAAGTTAG                               | <i>sipW</i> mutant construction                                       |
| NOB-0880  | TTTCTTTCTTATTCTCCAGAATCACTTTTCTTAG                               | <i>sipW</i> mutant construction                                       |
| NOB-0881  | GCGCggatccCTTTCAGCTTATCTCTCTGG                                   | <i>sipW</i> mutant construction                                       |
| NOB-0786  | ggccgtcgacctctctgcatcctgctatg                                    | <i>bsaA</i> mutant construction                                       |
| NOB-0787  | gtacctgcacctaaacaatttaattacctcccagt                              | <i>bsaA</i> mutant construction                                       |
| NOB-0788  | aggtaattaaattgtaggtgcaggactaatgc                                 | <i>bsaA</i> mutant construction                                       |
| NOB-0789  | gcgCGgatccctctcatctggctcttg                                      | <i>bsaA</i> mutant construction                                       |
| NOB-0818  | GGCCgtcgacACAACCTATAGAGCTATAGA                                   | <i>bsaB</i> mutant construction                                       |
| NOB-0819  | cccacctaaactCTTCATCCTTTTCACTCCTTGCA                              | <i>bsaB</i> mutant construction                                       |
| NOB-0820  | aaggATGAAGtAGttagggtgggagagatATGAAG                              | <i>bsaB</i> mutant construction                                       |
| NOB-0821  | GCGCggatccCTTGACCAAATCTTGAATCA                                   | <i>bsaB</i> mutant construction                                       |
| NOB-0822  | GGCCgtcgacATCCAGATGGACAAACTGCA                                   | <i>bsaC</i> mutant construction                                       |
| NOB-0823  | atcctttattgaCTTCATATCTCTCCCCACCTAAC                              | <i>bsaC</i> mutant construction                                       |
| NOB-0824  | gagatATGAAGtCAATAAAGGATGAAAAATACTTC                              | <i>bsaC</i> mutant construction                                       |
| NOB-0825  | GCGCggatccTATAAACTCTTCCACAGGTA                                   | <i>bsaC</i> mutant construction                                       |
| NOB-0801  | GGCCgtcgacAACAGATGTTGTTTCTAAGG                                   | <i>bsaR</i> mutant construction                                       |
| NOB-0802  | ATTACATATCGCcaTCGCATATTGCTATATTTAAC                              | <i>bsaR</i> mutant construction                                       |
| NOB-0803  | GCAATATGCGAtgGCGATATGTAAttttATGTATG                              | <i>bsaR</i> mutant construction                                       |
| NOB-0804  | GCGCggatccCACAAAGCTTCTATAGCATTATC                                | <i>bsaR</i> mutant construction                                       |
| NOB-0805  | GGCCgtcgacGTTATAAATAGTTCAATAAAGGATG                              | <i>bsaS</i> mutant construction                                       |
| NOB-0806  | TATGCACTGccCGTACATACATAAAATTACATATC                              | <i>bsaS</i> mutant construction                                       |
| NOB-0807  | TTTATGTATGTACGggCAGTGCATAAAATCATGG                               | <i>bsaS</i> mutant construction                                       |
| NOB-0808  | ATTTGGATATATTTCCACCCTTAGTTG                                      | <i>bsaS</i> mutant construction                                       |
| NOB-0826  | GGCCgtcgacCAGCATCCTCCTTATTGAAATC                                 | <i>srtB</i> mutant construction                                       |
| NOB-0827  | CTATTCTAGCCAaactactcacctcaataacga                                | <i>srtB</i> mutant construction                                       |
| NOB-0828  | gaggtgagtattATGGCTAGAATAGTAGTGGTAGC                              | <i>srtB</i> mutant construction                                       |
| NOB-0829  | GCGCggatccTGGGATATGAATAGGAATATGACAG                              | <i>srtB</i> mutant construction                                       |
| NOB-1196  | GGCCgtcgacAACTAAACTGGTATTTGCAATTGGA                              | <i>bsaD</i> mutant construction                                       |
| NOB-1197  | TAGCTTCTATTAAGATCCATTCTTCATattttctcca                            | <i>bsaD</i> mutant construction                                       |
| NOB-1198  | aatATGAAGAATGGATCTTTAATAGAAGCTAATATATCAG                         | <i>bsaD</i> mutant construction                                       |
| NOB-1199  | GCGCggatccgatagatttaaattcaaaagatcc                               | <i>bsaD</i> mutant construction                                       |
| NOB-0488  | GGCCGAGCTCAAGTCTAATTAAGACTTTAG                                   | <i>bgaR-PbgaL</i> cloning                                             |
| NOB-0489  | GCGCGGATCCCATTTTACCCTCCCAATACA                                   | <i>bgaR-PbgaL</i> cloning                                             |
| NOB-0921  | GCCggatccAGTAAGAAGAAAATAATAGGCTTATG                              | pCPO0515 construction                                                 |
| NOB-0903  | GCGCgtcgacttctactccttgcacatg                                     | pCPO0515 construction                                                 |
| NOB-0490  | GGCCagatctATGAAAAAAGGTATAAAAAAT                                  | pCPO0514-FLAG construction                                            |
| NOB-0905  | GCGCgtcgacACTTTTCTTTCTTATTCCTAAATA                               | pCPO0514-FLAG construction                                            |
| NOB-0455  | GGCCgtcgacGATTATAAAGATGATGACGATAAAGGTTAAAAA<br>TTTTAATTAGGATGGAG | FLAG tag and <i>lipA</i> intrinsic terminator<br>amplification        |
| NOB-0456  | GCGCaagcttTAAGCTATAGTATAAAACAAG                                  | <i>lipA</i> intrinsic terminator amplification                        |
| NOB-0932  | GAAGAAGTTTGCATTATTAACTTCAGTTTTGTTAGCTC                           | pCPE2001 construction                                                 |
| NOB-0933  | GCTAACAAAAGTGAAGTTAATAAATGCAAACTTCTTCAG                          | pCPE2001 construction                                                 |
| NOB-0600  | GGCCtctagaGTATATAAGAAAAGTTCAGC                                   | pCPE2001 construction                                                 |
| NOB-0929  | GGCCgtcgacTTAATGTTTTGCTTGCTCCTTG                                 | pCPE2001 construction                                                 |
| NOB-0916  | GGCCggatccgcttgatagatgctattttaagtg                               | pCPE2002 construction                                                 |
| NOB-0915  | GCGCtctagacttttctattcaacataaagtc                                 | pCPE2002 construction                                                 |
| NOB-0780  | ggccggatccctacgataattcaattacc                                    | pCPE2005 construction                                                 |
| NOB-0914  | GCGCtctagacagattttataacatcttaagta                                | pCPE2005 construction                                                 |
| NOB-0981  | GGCCgtcgacAAAAAAGGTATAAAAAATTTTTTATAATATTTTAT<br>TTTATGG         | pXCH- <i>sipW</i> and pXCH- <i>sipW</i> - <i>bsaA</i><br>construction |

|          |                                            |                                  |
|----------|--------------------------------------------|----------------------------------|
| NOB-0982 | GGCCagatctCTAACTTTTCTTTCTTATTCCTA          | pXCH-sipW construction           |
| NOB-0983 | GGCCagatctTTATTTATGTGCATTAGTACCTGC         | pXCH-sipW-bsaA construction      |
| NOB-1086 | CATatgcatccctccttgaatg                     | pXCH-pilA2 construction          |
| NOB-1087 | TCTAGATCTCATCATCATCATC                     | pXCH-pilA2 construction          |
| NOB-1090 | ggagggatgcatATGAATACAAAAAACAAAAAAG         | pXCH-pilA2 construction          |
| NOB-1091 | atgatgagatctagaCTATTGATTATTTCTTTTATTAGTTAC | pXCH-pilA2 construction          |
| NOB-0798 | TTAACCATGGTTTTTACATCAAGTGATTCTG            | pQE60-bsaA construction          |
| NOB-0799 | ATCTGGATCCTTTATGTGCATTAGTACCTGC            | pQE60-bsaA construction          |
| NOB-0910 | GGCCcctatggTAAATATAGCAATATGCGATGATGA       | pQE60-bsaR construction          |
| NOB-0911 | GCGCggatccCATATCGCTATTCTATTCATTAAG         | pQE60-bsaR construction          |
| NOB-0538 | GAAAGGGTTCACGCTAATTG                       | DIG-labeled <i>pilA2</i> probe   |
| NOB-0539 | ACTGATGCTGATGTGTTTGA                       | DIG-labeled <i>pilA2</i> probe   |
| NOB-0794 | GAAAATAATAGGCTTATGTATAGCC                  | DIG-labeled <i>bsaA</i> probe    |
| NOB-0795 | CATTTACTGCACCATTAGCAGCTTG                  | DIG-labeled <i>bsaA</i> probe    |
| NOB-0127 | GTTTTTTAACTATACTTATAGCATTTTTTAC            | DIG-labeled <i>sipW</i> probe    |
| NOB-0128 | CTTCTTACTCAATTTAAATTACCTCCCAG              | DIG-labeled <i>sipW</i> probe    |
| NOB-0129 | GCAATATGCGATGATGAAAAAGTCCAGCG              | DIG-labeled <i>sipW</i> probe    |
| NOB-0130 | CTTCTTCTAATGTTGCTATTTTCATATTG              | DIG-labeled <i>bsaR</i> probe    |
| NOB-0482 | CGCGGAATTCTGCGTTTGCTGGCTTTGATG             | 5' RLM-RACE                      |
| NOB-0483 | GCTGATGGCGATGAATGAACACTG                   | 5' RLM-RACE                      |
| NOB-0494 | GCGCggatccTTCCTGGCTTTATAGTAGGA             | 5' RLM-RACE                      |
| NOB-0591 | AAGGGAATTCCTGTAAATTAAGAAGGAGTGA            | pMOD-2-ermBP construction        |
| NOB-0592 | AAGGAAGCTTTTTACAAAAGCGACTCATAG             | pMOD-2-ermBP construction        |
| NOB-0301 | TGTTCAAGAAGTTATTAAGTCGGGAGTGC              | Sequencing of transposon mutants |
| NOB-0302 | CTTCTTTTACGTTTCCGGGTACAATTCCG              | Sequencing of transposon mutants |

---

# Original blots

## Figure 1C

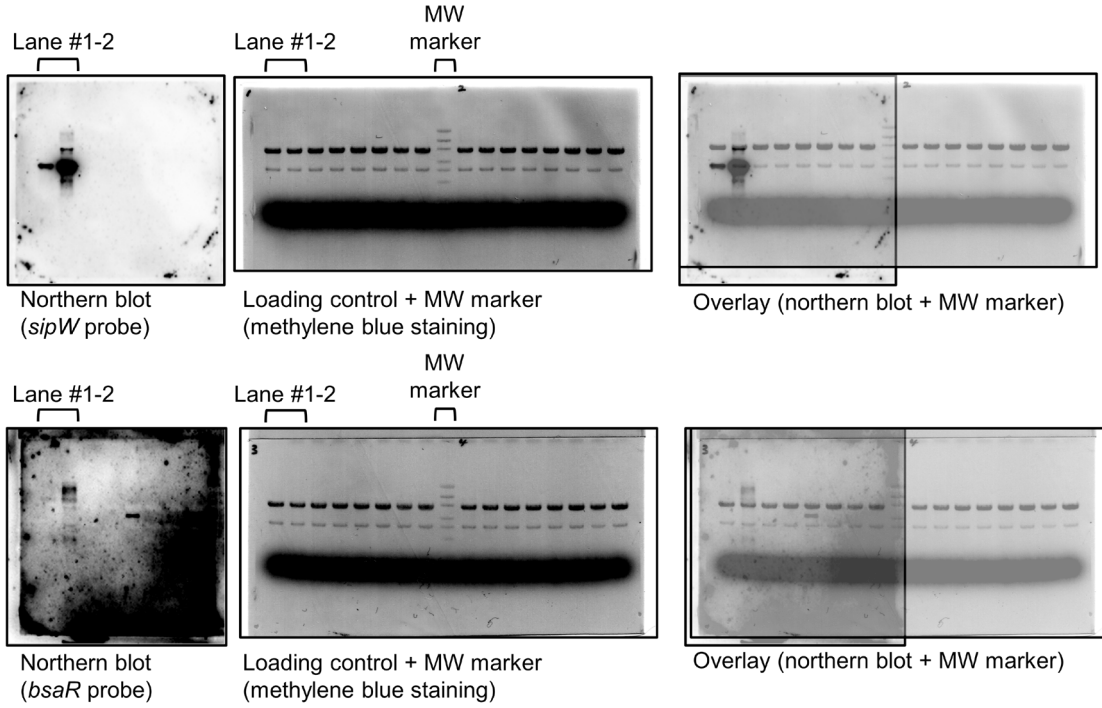

Figure 2A

MW  
marker  
□

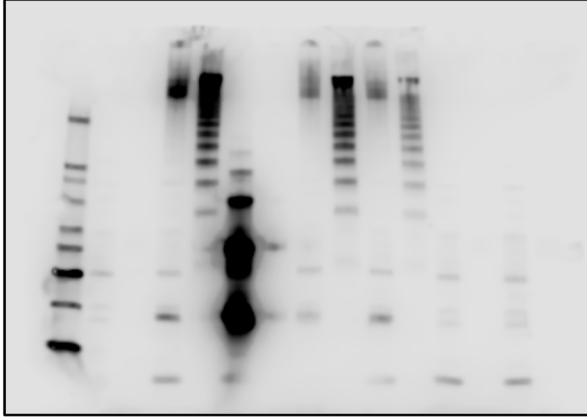

Western blot (anti-BsaA)

Figure 2B

MW  
marker lane #2-5  
□

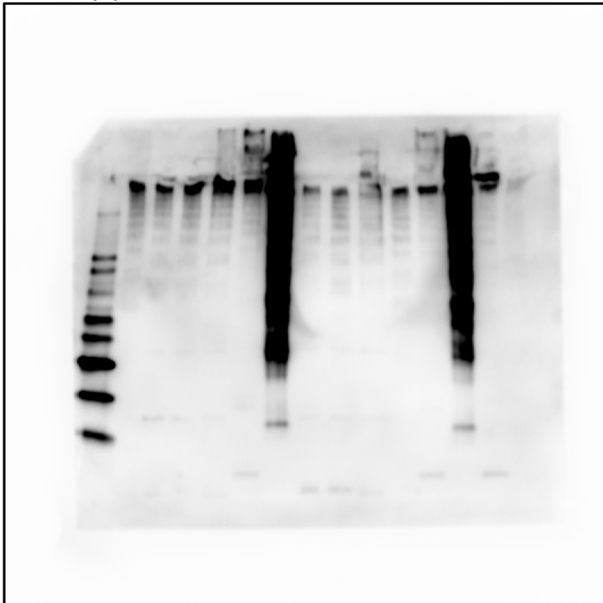

Western blot (anti-BsaA)

Figure 3A

MW  
marker  
□

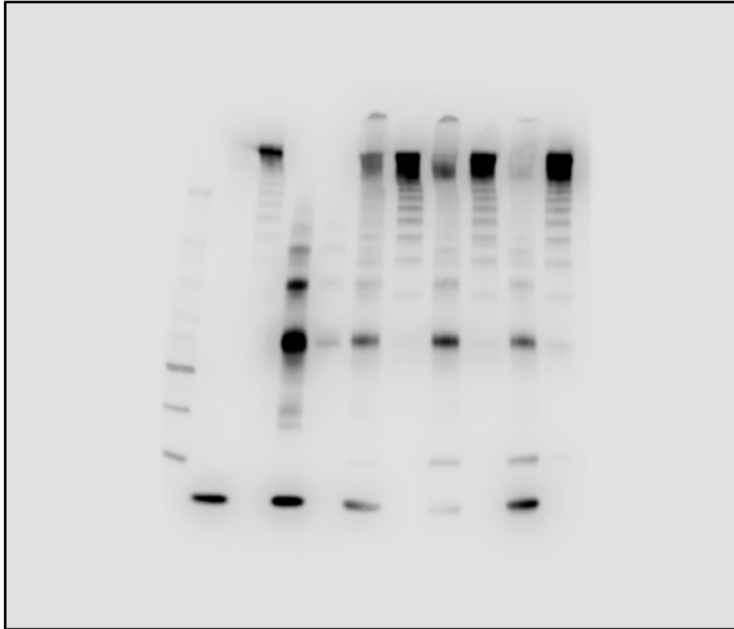

Western blot (Anti-BsaA)

MW  
marker  
□

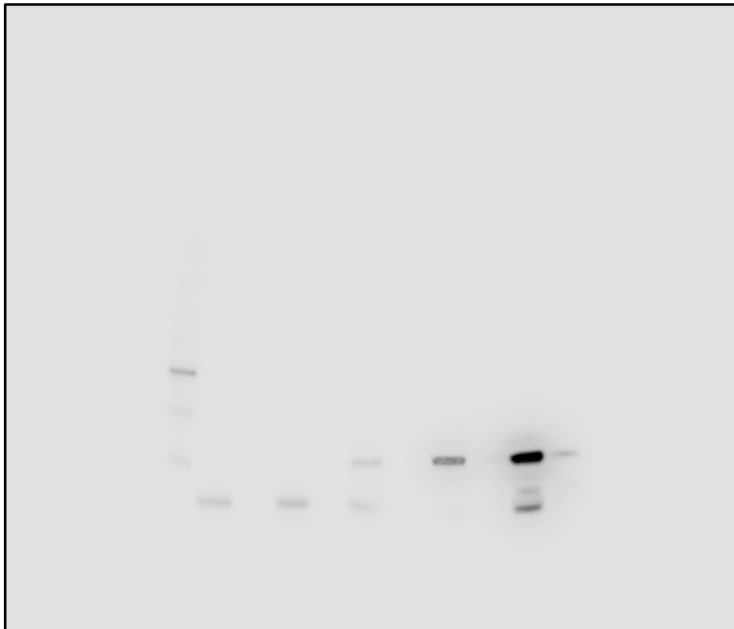

Western blot (Anti-FLAG)



Figure 8C

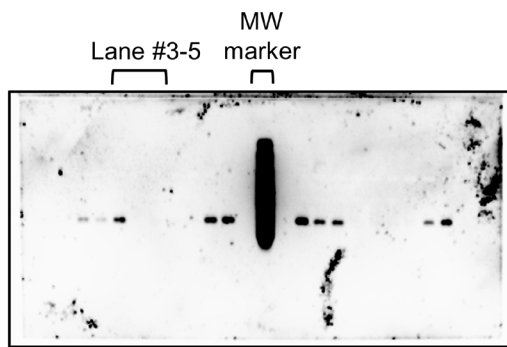

Northern blot (*pilA2*)

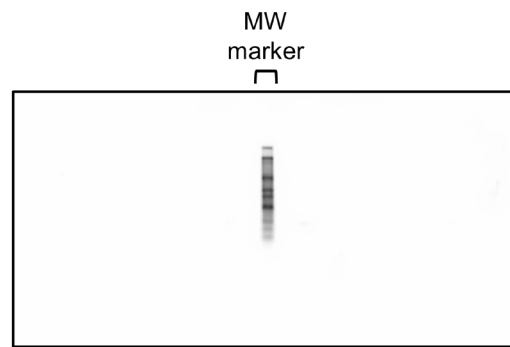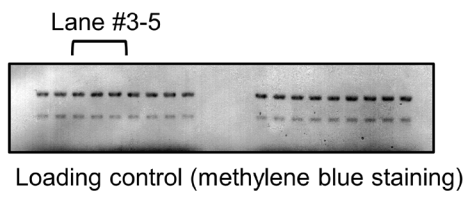

Loading control (methylene blue staining)

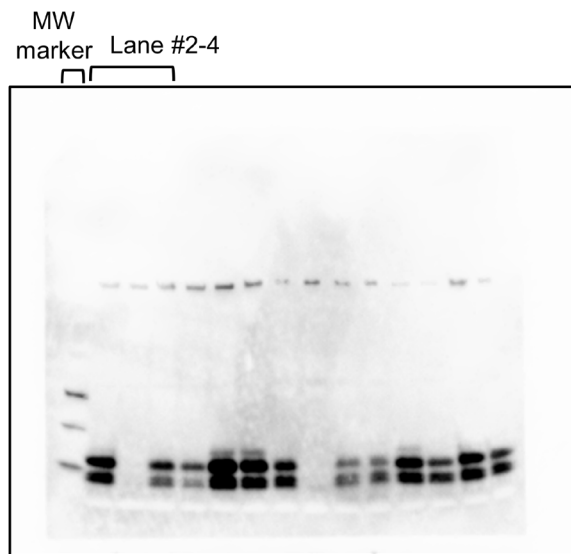

Western blot (Anti-PilA2)

## Supplementary Figure 1B

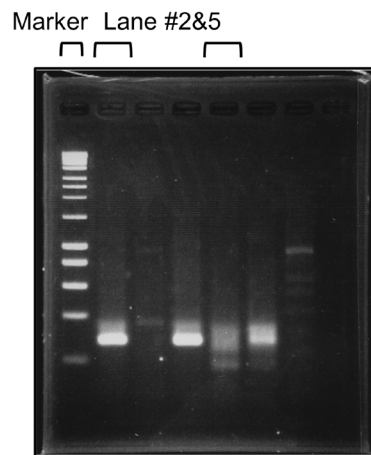

Agarose gel stained with ethidium bromide

## Supplementary Figure 2B

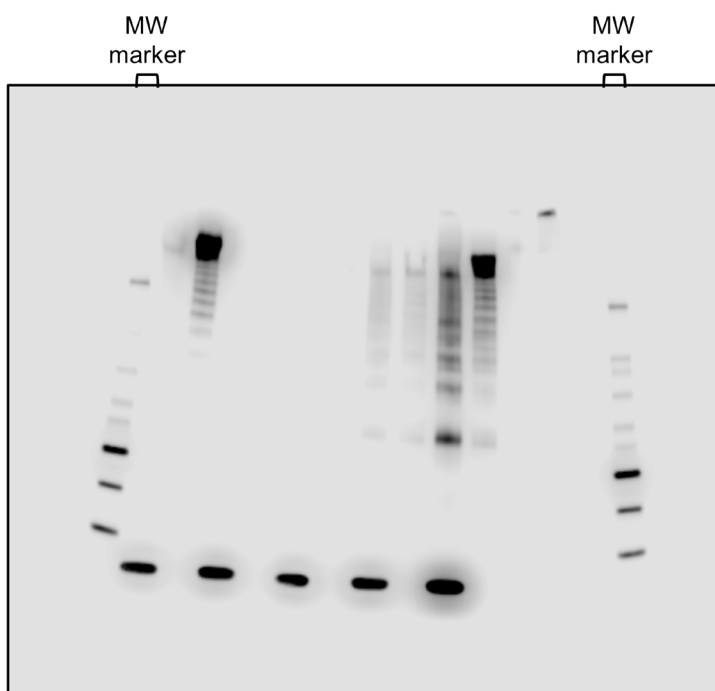

Western blot (Anti-BsaA)

## Supplementary Figure 4B

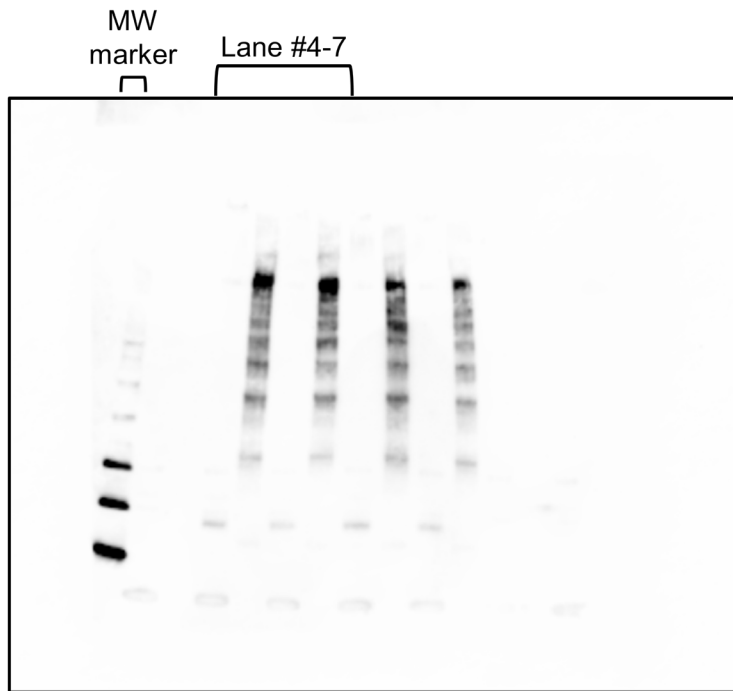

Western blot (Anti-BsaA)

## Supplementary Figure 5C

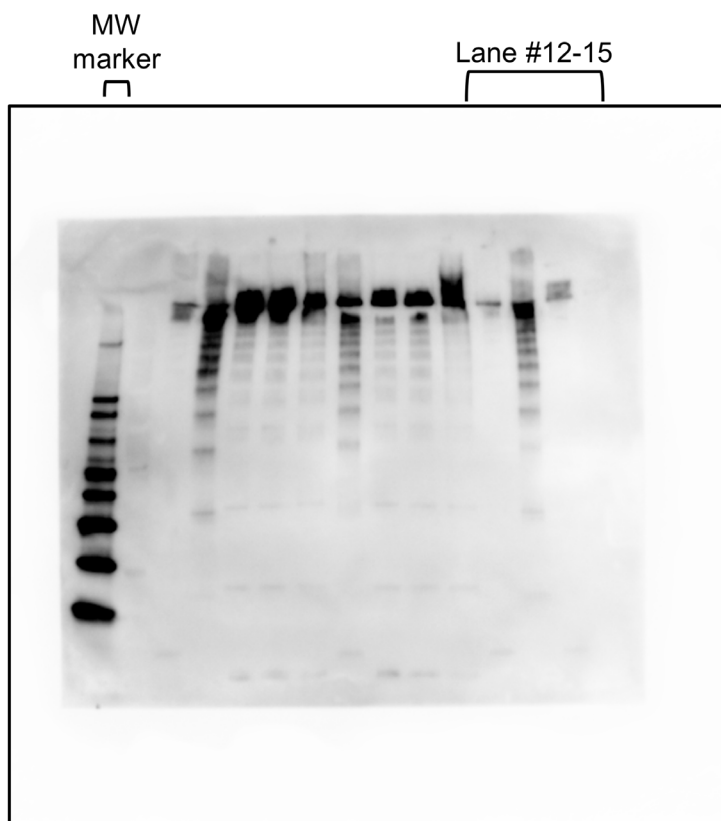

Western blot (Anti-BsaA)

## Supplementary Figure 8A

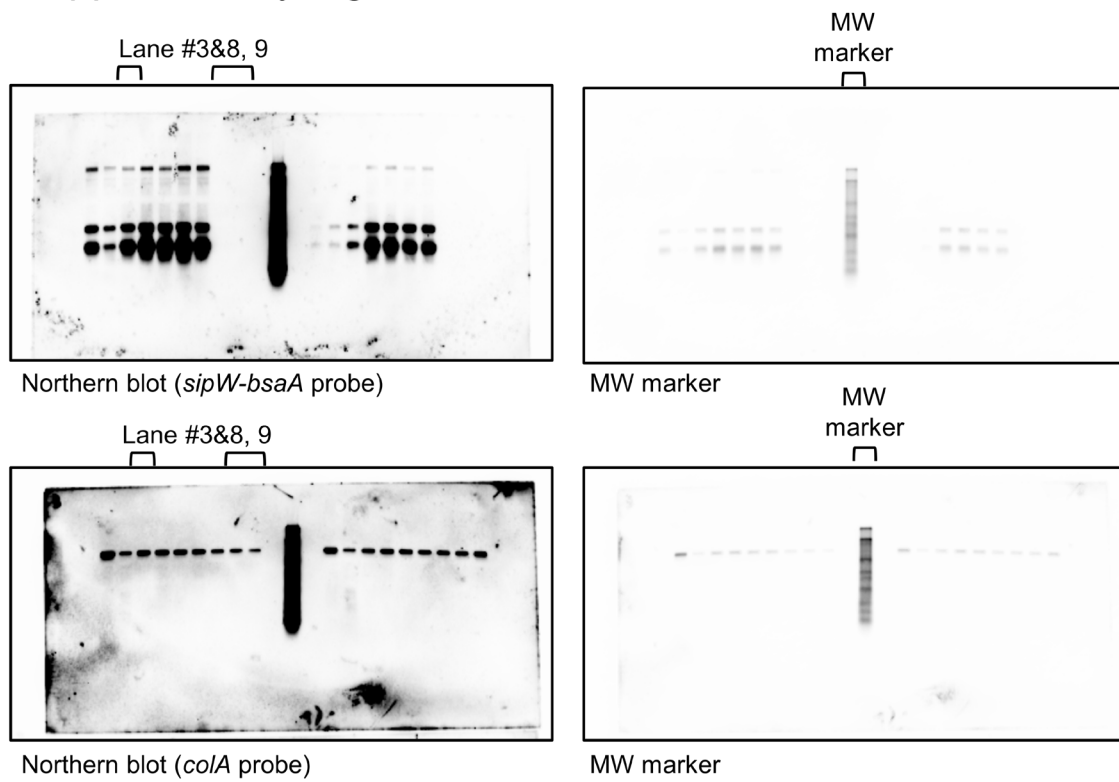

## Supplementary Figure 8B, C, D

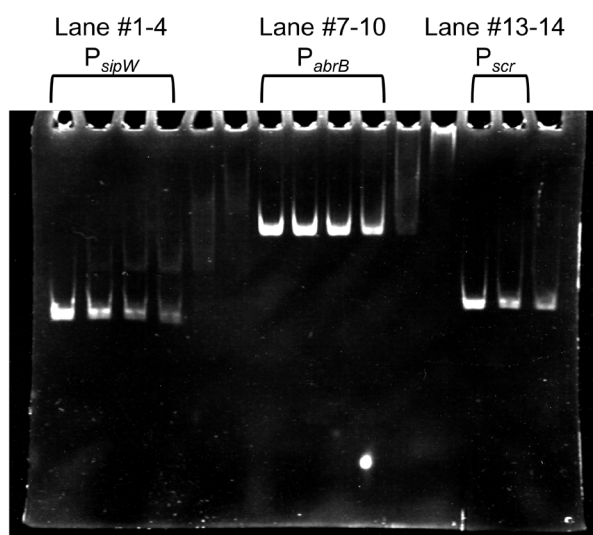

Acrylamide gel stained with ethidium bromide

# Supplementary Figure 10B

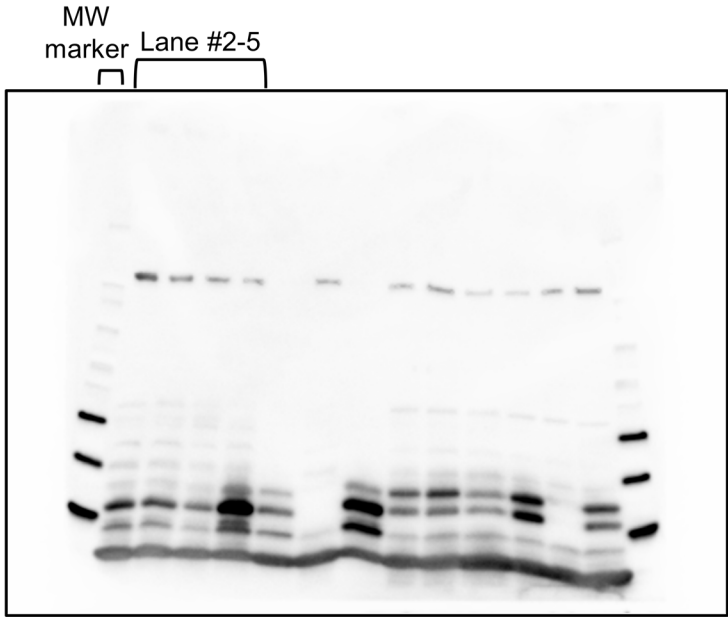

Western blot (Anti-PilA2)
